# Supplementary material for: A Novel Mouse Model of Intrahepatic Cholangiocarcinoma Induced by Azoxymethane
Source: MDPI journal article supplement (doi:10.3390/ijms241914581), 2023-09-26
Supplement: s1 [file s1]

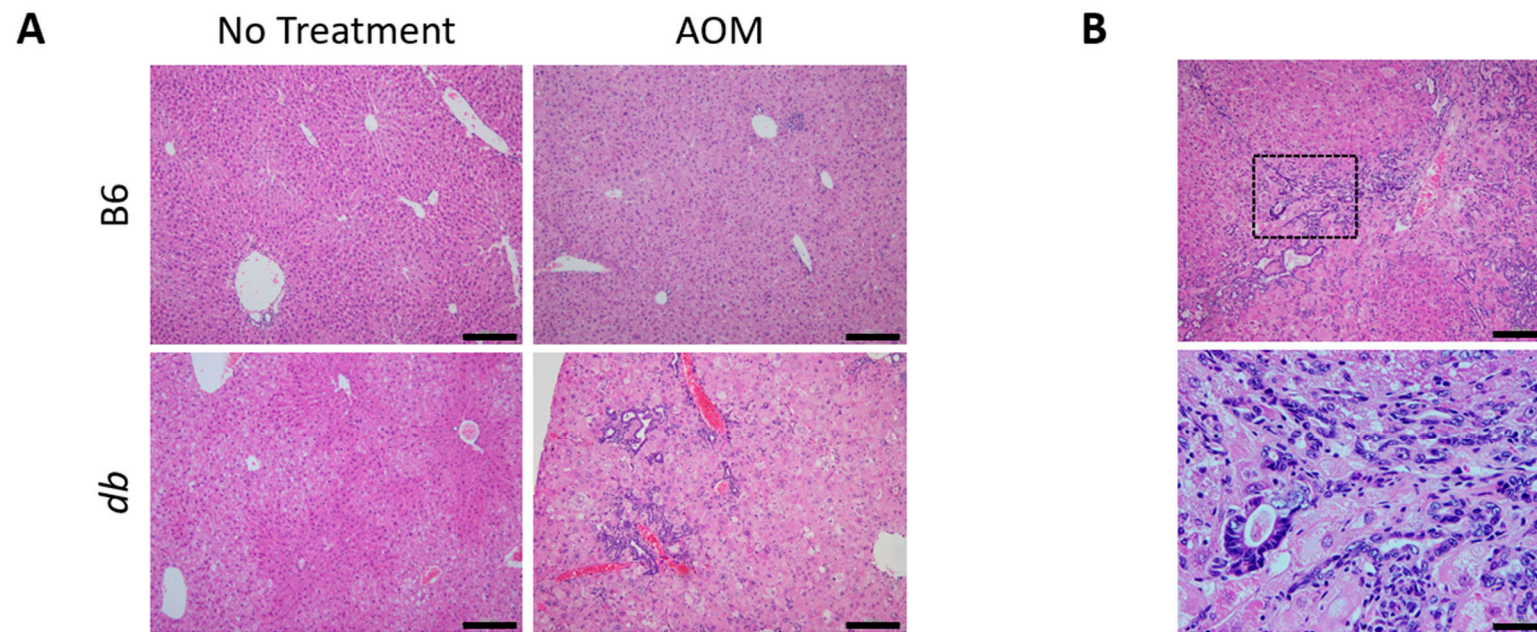

**Figure S1.** (A,B) Histopathological analyses for the liver of the experimental mice.

**Table S1.** Summary for previous reports and present study of rodent CCA models.

| Model (chemical or genetic modification)              | Animal | Type of lesion                | Time for tumor development | Yield         | Characteristics                                                             | Reference |
|-------------------------------------------------------|--------|-------------------------------|----------------------------|---------------|-----------------------------------------------------------------------------|-----------|
| DEN and BDL                                           | Mouse  | CCA                           | 28 weeks                   | 50%           | - Need technical skills for BDL<br>- Need longer time                       | [35]      |
| <i>Alb-Cre:Kras<sup>G12D</sup>:p53<sup>-/-</sup></i>  | Mouse  | CCA                           | 9 weeks                    | 83%           | - Concurrence of HCC<br>- Mean life span was 19 weeks<br>- Metastatic tumor | [25]      |
| <i>Alb-Cre:Kras<sup>G12D</sup>:Pten<sup>-/-</sup></i> | Mouse  | CCA                           | 8 weeks                    | Not indicated | - Growth disorder<br>- Median survival was 46 days                          | [26]      |
| TAA                                                   | Rat    | Cholangiocyte dysplasia - CCA | 24 weeks                   | 100%          | - Using rats<br>- Need longer time                                          | [36]      |
| AOM<br>(present study)                                | Mouse  | Atypical bile duct - CCA      | 12 weeks                   | 90%           | - Using db/db mice<br>- No genetic modification                             | N/A       |

AOM, azoxymethane; BDL, bile duct ligation; CCA, cholangiocarcinoma; DEN, diethylnitrosamine; HCC, hepatocellular carcinoma; TAA, thioacetamide.
